# Supplementary material for: AMMECR1: a single point mutation causes developmental delay, midface hypoplasia and elliptocytosis
Source: PubMed Central journal article supplement (PMC5502304; doi:10.1136/jmedgenet-2016-104100), 2016-11-03
Supplement: jmedgenet-2016-104100supp001.pdf [file jmedgenet-2016-104100supp001.pdf]

**Table 1** | Summary statistics for exome sequencing - mapping and coverage

| <b>ID</b>    | <b>Variants</b> | <b>% Autosome heterozygosity</b> | <b>% X heterozygosity</b> | <b>Pipeline gender</b> |
|--------------|-----------------|----------------------------------|---------------------------|------------------------|
| <b>II(1)</b> | 24934           | 61.358                           | 18.49                     | male                   |
| <b>II(2)</b> | 25001           | 61.2082                          | 18.13                     | male                   |

*Variants – total called variants; % Het – genome wide % of calls heterozygous; % X Het - % calls mapped to X chromosome heterozygous; Pipeline. Gender – apparent gender based upon % X Het.*
