# Supplementary material for: AMMECR1: a single point mutation causes developmental delay, midface hypoplasia and elliptocytosis
Source: PubMed Central journal article supplement (PMC5502304; doi:10.1136/jmedgenet-2016-104100), 2016-11-03
Supplement: jmedgenet-2016-104100supp002.pdf [file jmedgenet-2016-104100supp002.pdf]

Supplementary table 2

| II(1) | II(2) | Chr | Zygoty | gene     | var      | var info                               | Phylop   | Gerp | rsID       | cg46  | 1000g | ESP      | Soton DB | Soton | NDDB | PHRED |
|-------|-------|-----|--------|----------|----------|----------------------------------------|----------|------|------------|-------|-------|----------|----------|-------|------|-------|
| X     | X     | 7   | HOM    | ATP6V0A4 | SNV      | NM_130840:exon16:c.T1812C:p.H604H      | .        | .    | rs3807154  | 0.62  | 0.7   | 0.719186 | 4,1,5    |       | 313  | 222   |
| X     | X     | 7   | HOM    | ATP6V0A4 | SNV      | NM_130840:exon15:c.C1662T:p.F554F      | .        | .    | rs1026435  | 0.696 | 0.73  | 0.721512 | 4,1,5    |       | 317  | 222   |
| X     | X     | 7   | HOM    | ATP6V0A4 | SNV      | NM_130840:exon2:c.T5C:p.V2A            | 0.781742 | 1.58 | rs10258719 | 0.674 | 0.66  | 0.725116 | 1,3,4    |       | 317  | 222   |
| .     | X     | 7   | HOM    | ATP6V0A4 | splicing | NM_130841:exon4:c.196+10->TTTTTTTTTTT  | .        | .    | .          | .     | .     | .        | 0,0,0    |       | 13   | 114   |
| X     | X     | 3   | HOM    | CASR     | SNV      | NM_000388:exon7:c.G2244C:p.P748P       | .        | .    | rs2036400  | 0.957 | 0.97  | 0.999418 | 6,0,6    |       | 340  | 222   |
| X     | X     | 3   | HOM    | CASR     | nsSNV    | CASR:NM_000388:exon7:c.G3031C:p.E1011Q | 0.983708 | 5.36 | rs1801726  | 0.913 | 0.92  | 0.959535 | 6,0,6    |       | 339  | 222   |
| .     | X     | 21  | HET    | CLDN14   | SNV      | NM_012130:exon2:c.G687A:p.T229T        | .        | .    | rs219780   | 0.12  | 0.15  | 0.210116 | 0,2,2    |       | 101  | 67    |
| .     | X     | 21  | HET    | CLDN14   | SNV      | NM_012130:exon2:c.C243T:p.R81R         | .        | .    | rs219779   | 0.228 | 0.2   | 0.257326 | 0,4,4    |       | 134  | 220   |
| X     | .     | 3   | HET    | CLDN16   | nsSNV    | NM_006580:exon2:c.G379A:p.G127R        | 0.999683 | 5.37 | .          | .     | .     | .        | 0,0,0    |       | 1    | 198   |
| .     | X     | 3   | HET    | CLDN16   | splicing | NM_006580:exon1:c.324+10T>C            | .        | .    | rs1491994  | 0.109 | 0.14  | 0.248023 | 2,0,2    |       | 122  | 98    |
| .     | X     | 3   | HET    | CLDN16   | fs_del   | NM_006580:exon1:c.166delG:p.A56fs      | .        | .    | .          | .     | .     | .        | 2,0,2    |       | 120  | 217   |
| X     | X     | 12  | HOM    | VDR      | SNV      | NM_001017536:exon10:c.T1206C:p.I402I   | .        | .    | rs731236   | 0.228 | 0.26  | 0.394419 | 0,1,1    |       | 202  | 205   |
| X     | X     | 12  | HET    | VDR      | nsSNV    | NM_001017536:exon3:c.T152C:p.M51T      | 0.978818 | 3.23 | rs2228570  | 0.728 | 0.65  | 0.61407  | 2,4,6    |       | 278  | 70    |

| Gene     | % Coverage |
|----------|------------|
| CASR     | 93.81      |
| PTH      | 86.49      |
| CLCN5    | 91.95      |
| TRPV5    | 100.00     |
| CLDN14   | 44.98      |
| CLDN16   | 97.22      |
| PMCA4    | 95.15      |
| VDR      | 96.85      |
| OPN      | 91.68      |
| MGP      | 100.00     |
| AE1      | 97.31      |
| ATP6V1B1 | 100.00     |
| ATP6V0A4 | 90.35      |
| SLC34A1  | 98.35      |
| HPRT1    | 100.00     |

*A table filtered for all variants found in known hypercalciuria genes. Variants common to the half-siblings II(1) and II(2) are highlighted in green. All shared variants were common in population databases and in the local Southampton non-disease database (Soton NDDDB) and are highlighted in orange. Percentage gene coverage for all hypercalciuria genes are tabulated and suboptimal coverage (<90%) is highlighted in red.*

*Chr – chromosome; var – variant type; SNV – synonymous single nucleotide variant; nsSNV – non-synonymous single nucleotide variant; var info – variant info; cg46 – complete genomics 46 database; 1000g – 1000 genomes population database; ESP – exome sequencing project population database; Soton DB – Southampton disease database; Soton NDDDB – Southampton non-disease database.*
