# Supplementary material for: AMMECR1: a single point mutation causes developmental delay, midface hypoplasia and elliptocytosis
Source: PubMed Central journal article supplement (PMC5502304; doi:10.1136/jmedgenet-2016-104100), 2016-11-03

## Supplementary Figure 1

Known and predicted *AMMECR1* protein-protein interactions (taken from STRING database).

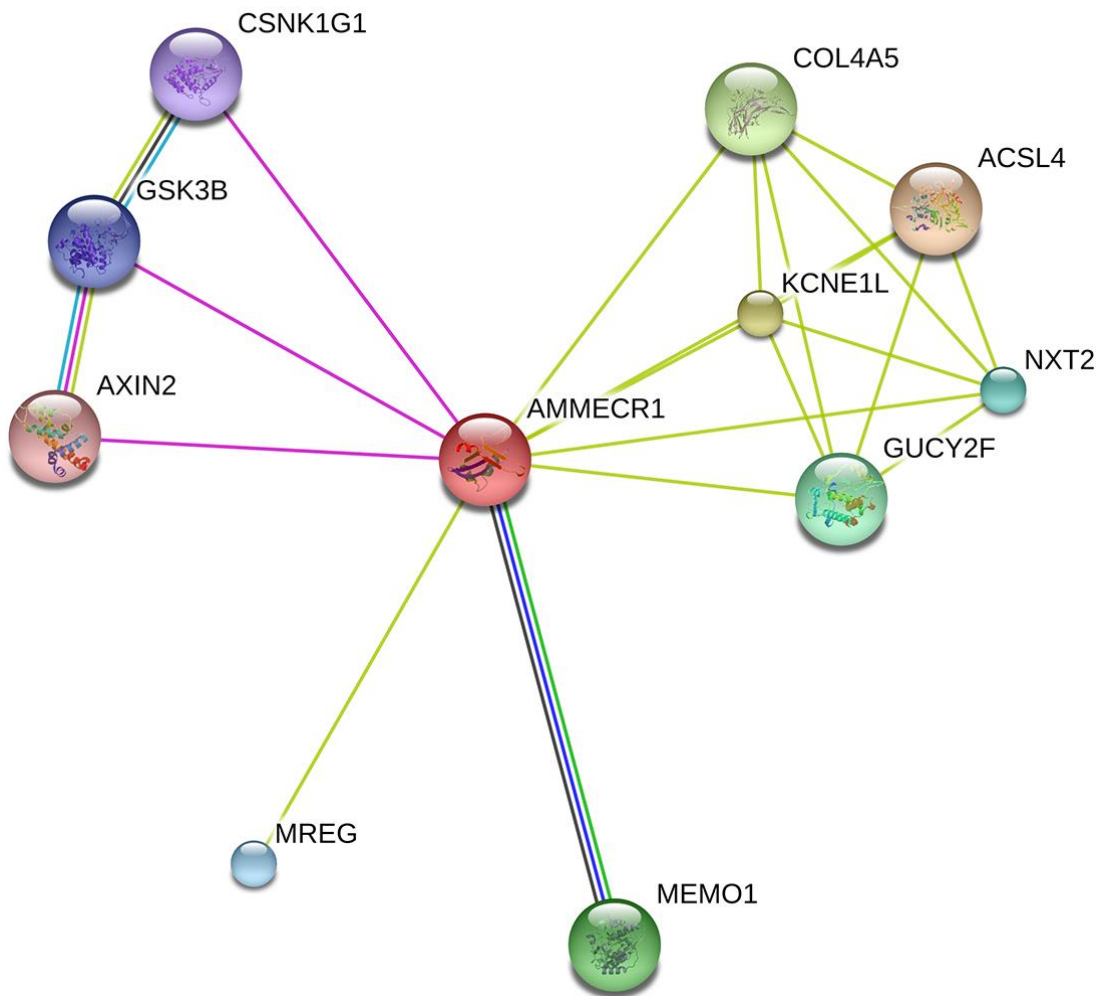

Supplement: jmedgenet-2016-104100supp003.pdf [file jmedgenet-2016-104100supp003.pdf]
